# Supplementary material
Source: publisher figshare collection journal article supplement (https://gsajournals.figshare.com/articles/dataset/_/16546098)
Supplement: Supplementary file 1 [file 3]

# Supplemental Data

## File S4. SapTrap assembly information

| Four Module CeLINC Donor Plasmid Assembly (pMLS257 as destination vector)                                            |                                               |                                                              |                                 |
|----------------------------------------------------------------------------------------------------------------------|-----------------------------------------------|--------------------------------------------------------------|---------------------------------|
| Slot 1 – promoter                                                                                                    | Slot 2                                        | Slot 3                                                       | Slot 4 – 3' UTR                 |
| 5' TGG / AAG 3' overhangs                                                                                            | 5' AAG / ACG 3' overhangs                     | 5' ACG / TGC 3' overhangs                                    | 5' TGC / GTA 3' overhangs       |
| pJRK151 ( <i>Prps-0</i> )<br>pJRK142 ( <i>Phsp-16.48</i> )<br>pJRK143 ( <i>Pelt-2</i> )<br>pJRK246 ( <i>Pwrt-2</i> ) | pJRK107 (CIBN-3xFLAG)<br>pJRK109 (CRY2(olig)) | pJRK108 (MP)<br>pJRK112 (VHH(GFP))<br>pJRK254 (VHH(mCherry)) | pJRK153 ( <i>unc-54 3'UTR</i> ) |

| Five Module CeLINC Donor Plasmid Assembly (fluorescent CRY2 or CIBN N-terminal tag) pMLS257 as destination vector |                           |                                               |                                                            |                                  |
|-------------------------------------------------------------------------------------------------------------------|---------------------------|-----------------------------------------------|------------------------------------------------------------|----------------------------------|
| Slot 1 - promoter                                                                                                 | Slot 2 - FP               | Slot 3                                        | Slot 4                                                     | Slot 5- 3' UTR                   |
| 5' TGG / ATG 3' overhangs                                                                                         | 5' ATG / AAG 3' overhangs | 5' AAG / ACG 3' overhangs                     | 5' ACG / TGC 3' overhangs                                  | 5' TGC / GTA 3' overhangs        |
| pJRK1 ( <i>Prps-0</i> )                                                                                           | pDD375 (mKate2)           | pJRK107 (CIBN-3xFLAG)<br>pJRK109 (CRY2(olig)) | pJRK108 (MP)<br>pJRK112(VHH(GFP))<br>pJRK254(VHH(mCherry)) | pJRK153 ( <i>unc-54 3' UTR</i> ) |

| Four Module Fluorescent Bait or Prey Protein Tag Assemblies (fluorescent N-terminal tag) pMLS257 as destination vector |                           |                              |                                 |
|------------------------------------------------------------------------------------------------------------------------|---------------------------|------------------------------|---------------------------------|
| Slot 1 - promoter                                                                                                      | Slot 2 - FP               | Slot 3 - cDNA                | Slot 4 - 3' UTR                 |
| 5' TGG / ATG 3' overhangs                                                                                              | 5' ATG / AAG 3' overhangs | 5' AAG / ACG 3' overhangs    | 5' ACG / GTA 3' overhangs       |
| pJRK1 ( <i>Prps-0</i> )                                                                                                | pDD375 (mKate2)           | pJRK120 ( <i>par-6</i> cDNA) | pJRK150 ( <i>unc-54 3'UTR</i> ) |

| One-step promoter insertion into CRY2(olig)::VHH(GFP)::T2A::CIBN-3xFLAG::MP::unc-54 3' UTR<br>pJRK261 as destination vector |  |
|-----------------------------------------------------------------------------------------------------------------------------|--|
| Slot 1 - promoter                                                                                                           |  |
| 5' TGG / ATG 3' overhangs                                                                                                   |  |
| pJRK1 ( <i>Prps-0</i> )                                                                                                     |  |
