# Supplementary material
Source: publisher figshare collection journal article supplement (https://gsajournals.figshare.com/articles/dataset/_/16546098)
Supplement: Supplementary file 2 [file 3]

## Supplemental Data

### File S3. Primers and sequences used for cloning

| Name   | Sequence 5' to 3'                                  | Use                                |
|--------|----------------------------------------------------|------------------------------------|
| 112 F  | GAGCTCTTCGACGATGGACCAAGTCCAACCTCGT                 | pJRK112 GFP nanobody amplification |
| 112 R  | CCGCTCTTCGGCAGGAGGAGACGGTGACTTGGG                  | pJRK112 GFP nanobody amplification |
| 120 F  | CTGCTCTTCGAAGATGTCCTACAACGGCTCCTA                  | pJRK120 par-6 cDNA amplification   |
| 120 R  | CTGCTCTTCGCGTGTCCTCTCCACTGTCCGAA                   | pJRK120 par-6 cDNA amplification   |
| 248a F | GCATGGATGTTTTCCAGTCACGACGTTGTAAAC                  | pJRK248 Gibson assembly fragment A |
| 248a R | GAAAGCAAAAATCTGAATCTCAAATATTTTATTAGAAAA<br>CACCAAC | pJRK248 Gibson assembly fragment A |
| 248b F | ATTTGAGATTGAGATTTTTGCTTTCGTCGTAAATC                | pJRK248 Gibson assembly fragment B |
| 248b R | GTCGTGACTGGGAAAACATCCATGCTAGCGTTAAC                | pJRK248 Gibson assembly fragment B |
| 259a F | CATCATTCAACATCAATACCAATGCATTCTGCGTCTG              | pJRK259 Gibson assembly fragment A |
| 259a R | AAAAGTGCTCATCATTGAAAACGTTCTTCGGGGCGA               | pJRK259 Gibson assembly fragment A |
| 259b F | ACGTTTTCCAATGATGAGCACTTTTAAAGTTCTGCTATG            | pJRK259 Gibson assembly fragment B |
| 259b R | GCATTGGTATTGATGTTGAATGATGATTTTGATGGTAG             | pJRK259 Gibson assembly fragment B |
| 142 F  | CTGCTCTTCGTGGGGTTTCGGTTTTGTCACTGTA                 | pJRK142 Phsp-16.48 amplification   |
| 142 R  | AGGCTCTTCGCTTTTCTTGAAGTTTAGAGAATG                  | pJRK142 Phsp-16.48 amplification   |
| 143 F  | CTGCTCTTCGTGGTAATTTTCGAAAT                         | pJRK143 Pelt-2 amplification       |
| 143 R  | GTGCTCTTCGCTTTCTATAATCTATTTTCTAGT                  | pJRK143 Pelt-2 amplification       |
| 246 F  | AGCTGCTCTTCGTGGCAGGTCGACTCCACGTAATT                | pJRK246 Pwrt-2 amplification       |
| 246 R  | GTGCTCTTCGCTTCCGAGAAACAATTGGCAGGT                  | pJRK246 Pwrt-2 amplification       |
| 260a F | ACCGCAATTTTAAATCAAGCTTATCGATACCGTCG                | pJRK260 Gibson assembly fragment A |
| 260a R | CGAAAGCAAAAATCCAATCGAATTCCTGCAGCC                  | pJRK260 Gibson assembly fragment A |
| 260b F | GAATTCGATTGGATTTTTGCTTTCGTCGTAAATCTACAC<br>AC      | pJRK260 Gibson assembly fragment B |
| 260b R | GGAGGAGACGGTGACTTGGG                               | pJRK260 Gibson assembly fragment B |

|                   |                                                                                                                                                               |                                    |
|-------------------|---------------------------------------------------------------------------------------------------------------------------------------------------------------|------------------------------------|
| <b>260c F</b>     | ATGAACGGAGCTATCGGAGG                                                                                                                                          | pJRK260 Gibson assembly fragment C |
| <b>260c R</b>     | GATAAGCTTGATTAATAAATTGCGGTCATAAACTGAAAC                                                                                                                       | pJRK260 Gibson assembly fragment C |
| <b>260 gBlock</b> | GACAAGGAACCCAAGTCACCGTCTCCTCCGGCGGTGG<br>GGGAGAGGGACGTGGATCCCTCCTCACCTGCGGAGAC<br>GTCGAGGAGAACCCAGGACCAATGAACGGAGCTATCG<br>GAGGAGACCTTCTC                     | pJRK260 gBlock Fragment C          |
| <b>261a F</b>     | ACCGCAATTTTAAATCAAGCTTATCGATACCGTCG                                                                                                                           | pJRK261 Gibson assembly fragment A |
| <b>261a R</b>     | CCAATCGAATTCCTGCAGCC                                                                                                                                          | pJRK261 Gibson assembly fragment A |
| <b>261b F</b>     | ATGAAGATGGATAAGAAGAC                                                                                                                                          | pJRK261 Gibson assembly fragment B |
| <b>261b R</b>     | GATAAGCTTGATTAATAAATTGCGGTCATAAACTGAAAC                                                                                                                       | pJRK261 Gibson assembly fragment B |
| <b>261 gBlock</b> | GGCTGCAGGAATTTCGATTGGCGAAGAGCGCATGCCTG<br>CAGGTCGACTCTAGAGGATCCCCGGGTACCGAGCTCG<br>AATTCCTATGGATCCACTAGTCATATGGAATTCTGCAG<br>GCCTGCTCTTCGATGAAGATGGATAAGAAGAC | pJRK261 gBlock Fragment C          |
| <b>262a F</b>     | ATTCGATTGGTAATTTTCGAAATGTATGAACTCCAATTC                                                                                                                       | pJRK262 Gibson assembly fragment A |
| <b>262a R</b>     | GTTGCATCCATTCTATAATCTATTTTCTAGTTTCTATTTT<br>ATTAG                                                                                                             | pJRK262 Gibson assembly fragment A |
| <b>262b F</b>     | ATAGATTATAGAATGGATGCAACCAGCGAGCG                                                                                                                              | pJRK262 Gibson assembly fragment B |
| <b>262b R</b>     | CCCCCACC GCCGACATTGTGTGCAAATTCTGAGAAGTA<br>TGG                                                                                                                | pJRK262 Gibson assembly fragment B |
| <b>262c F</b>     | GCACACAATGTCGGCGGTGGGGGAATGTCCAA                                                                                                                              | pJRK262 Gibson assembly fragment C |
| <b>262c R</b>     | AGAGTAATTGGATTACTTGTAGAGCTCGTCCATTCCTC<br>C                                                                                                                   | pJRK262 Gibson assembly fragment C |
| <b>262d F</b>     | TCTACAAGTAATCCAATTACTCTTCAACATC                                                                                                                               | pJRK262 Gibson assembly fragment D |
| <b>262d R</b>     | TTCGAAATTACCAATCGAATTCCTGCAGCC                                                                                                                                | pJRK262 Gibson assembly fragment D |
| <b>263a F</b>     | ATTCGATTGGTAATTTTCGAAATGTATGAACTCCAATTC                                                                                                                       | pJRK263 Gibson assembly fragment A |
| <b>263a R</b>     | TCGTGGGACATTCTATAATCTATTTTCTAGTTTCTATTTT<br>ATTAG                                                                                                             | pJRK263 Gibson assembly fragment A |
| <b>263b F</b>     | ATAGATTATAGAATGTCCACGAGTCATCGGAAAAAG                                                                                                                          | pJRK263 Gibson assembly fragment B |
| <b>263b R</b>     | CCTTTACTCATATGACGTGGCACCCAAATTG                                                                                                                               | pJRK263 Gibson assembly fragment B |
| <b>263c F</b>     | GTGCCACGTCATATGAGTAAAGGAGAAGAATTGTTAC                                                                                                                         | pJRK263 Gibson assembly fragment C |
| <b>263c R</b>     | AGAGTAATTGGATTACGTGTAGAGCTCGTCCATTC                                                                                                                           | pJRK263 Gibson assembly fragment C |
| <b>263d F</b>     | TCTACACGTAATCCAATTACTCTTCAACATC                                                                                                                               | pJRK263 Gibson assembly fragment D |

|               |                                         |                                    |
|---------------|-----------------------------------------|------------------------------------|
| <b>263d R</b> | TTCGAAATTACCAATCGAATTCCTGCAGCC          | pJRK263 Gibson assembly fragment D |
| <b>264a F</b> | ATTCGATTGGTAATTTTCGAAATGTATGAACTCCAATTC | pJRK264 Gibson assembly fragment A |
| <b>264a R</b> | GATTTTCGCTCTGACTCGTGGGACATTCTATAATC     | pJRK264 Gibson assembly fragment A |
| <b>264b F</b> | CCCACGAGTCAGAGCGAAAATCAGATGCAG          | pJRK263 Gibson assembly fragment B |
| <b>264b R</b> | AGAGTAATTGGATTACGTGTAGAGCTCGTCCATTC     | pJRK263 Gibson assembly fragment B |
| <b>264c F</b> | TCTACACGTAATCCAATTACTCTTCAACATC         | pJRK263 Gibson assembly fragment C |
| <b>264c R</b> | TTCGAAATTACCAATCGAATTCCTGCAGCC          | pJRK263 Gibson assembly fragment C |
