# Supplementary material
Source: publisher figshare collection journal article supplement (https://gsajournals.figshare.com/articles/dataset/_/16546098)
Supplement: Supplementary file 3 [file 3]

# Supplemental Data

## File S2. Plasmid information

| Name    | Description                                                                                                        | Function            | Res. Cassette | Addgene # | Reference                     |
|---------|--------------------------------------------------------------------------------------------------------------------|---------------------|---------------|-----------|-------------------------------|
| pJRK136 | <i>Prps-0::CIBN-3xFLAG::MP::unc-54 3' UTR</i>                                                                      | CeLINC assay        | Ampicillin    | 173744    | This study                    |
| pJRK137 | <i>Prps-0::mKate2::CRY2(olig)::VHH(GFP)::unc-54 3' UTR</i>                                                         | CeLINC assay test   | Ampicillin    | 173745    | This study                    |
| pJRK138 | <i>Prps-0::CRY2(olig)::VHH(GFP)::unc-54 3' UTR</i>                                                                 | CeLINC assay        | Ampicillin    | 173746    | This study                    |
| pJRK248 | <i>Prps-0::HygR::unc-54 3'UTR; Psqt-1::sqt-1::sqt-1 3' UTR</i>                                                     | coinjection marker  | Kanamycin     | 173755    | This study                    |
| pJRK249 | <i>Prps-0::CRY2(olig)::VHH(mCherry)::unc-54 3' UTR</i>                                                             | CeLINC assay        | Ampicillin    | 173747    | This study                    |
| pJRK251 | <i>Pwrt-2::CRY2(olig)::VHH(GFP)::unc-54 3' UTR</i>                                                                 | CeLINC assay        | Ampicillin    | 173748    | This study                    |
| pJRK252 | <i>Pelt-2::CRY2(olig)::VHH(GFP)::unc-54 3' UTR</i>                                                                 | CeLINC assay        | Ampicillin    | 173749    | This study                    |
| pJRK253 | <i>Phsp-16.48::CRY2(olig)::VHH(GFP)::unc-54 3' UTR</i>                                                             | CeLINC assay        | Ampicillin    | 173750    | This study                    |
| pJRK258 | <i>Prps-0::mKate2::par-6::unc-54 3' UTR</i>                                                                        | CeLINC assay test   | Ampicillin    | 173751    | This study                    |
| pJRK259 | <i>Prps-0::mKate2:: par-6(ΔPB1)::unc-54 3' UTR</i>                                                                 | CeLINC assay test   | Ampicillin    | 173752    | This study                    |
| pJRK260 | <i>Prps-0::CRY2(olig)::VHH(GFP)::T2A::CIBN-3xFLAG::MP::unc-54 3' UTR</i>                                           | CeLINC assay        | Ampicillin    | 173753    | This study                    |
| pJRK261 | <i>(empty promoter module with flanking SapI sites)::CRY2(olig)::VHH(GFP)::T2A::CIBN-3xFLAG::MP::unc-54 3' UTR</i> | destination plasmid | Ampicillin    | 173754    | This study                    |
| pJRK262 | <i>Pelt-2::ajm-1::mCherry::unc-54 3' UTR</i>                                                                       | CeLINC assay test   | Ampicillin    | N/A       | This study                    |
| pJRK263 | <i>Pelt-2::dlg-1::GFP::unc-54 3' UTR</i>                                                                           | CeLINC assay test   | Ampicillin    | N/A       | This study                    |
| pJRK264 | <i>Pelt-2::dlg-1(ΔL27)::GFP::unc-54 3' UTR</i>                                                                     | CeLINC assay test   | Ampicillin    | N/A       | This study                    |
| pMLS257 | <i>backbone destination plasmid</i>                                                                                | destination plasmid | Ampicillin    | 73716     | (Schwartz and Jorgensen 2016) |
| pJRK1   | <i>Prps-0 (TGG/ATG overhangs)</i>                                                                                  | donor plasmid       | Kanamycin     | 173730    | (Yao <i>et al.</i> 2020)      |
| pJRK151 | <i>Prps-0 (TGG/AAG overhangs)</i>                                                                                  | donor plasmid       | Kanamycin     | 173739    | (Yao <i>et al.</i> 2020)      |
| pJRK142 | <i>Phsp-16.48</i>                                                                                                  | donor plasmid       | Kanamycin     | 173736    | This study                    |

|                |                                          |                   |            |        |                          |
|----------------|------------------------------------------|-------------------|------------|--------|--------------------------|
| <b>pJRK143</b> | <i>Pelt-2</i>                            | donor plasmid     | Kanamycin  | 173737 | This study               |
| <b>pJRK246</b> | <i>Pwrt-2</i>                            | donor plasmid     | Kanamycin  | 173741 | This study               |
| <b>pJRK109</b> | <i>CRY2(olig)</i>                        | donor plasmid     | Kanamycin  | 173733 | This study               |
| <b>pJRK112</b> | <i>VHH(GFP) (nanobody)</i>               | donor plasmid     | Kanamycin  | 173735 | This study               |
| <b>pJRK254</b> | <i>VHH(mCherry) (nanobody)</i>           | donor plasmid     | Kanamycin  | 173742 | This study               |
| <b>pJRK107</b> | <i>CIBN-3xFLAG</i>                       | donor plasmid     | Kanamycin  | 173731 | This study               |
| <b>pJRK108</b> | <i>MP (multimeric protein)</i>           | donor plasmid     | Kanamycin  | 173732 | This study               |
| <b>pJRK120</b> | <i>par-6 cDNA</i>                        | donor plasmid     | Kanamycin  | N/A    | This study               |
| <b>pJRK51</b>  | <i>dlg-1 cDNA</i>                        | CeLINC assay test | Kanamycin  | N/A    | This study               |
| <b>pJRK265</b> | <i>ajm-1 cDNA</i>                        | CeLINC assay test | Kanamycin  | N/A    | This study               |
| <b>pJRK150</b> | <i>unc-54 3' UTR (ACG/GTA overhangs)</i> | donor plasmid     | Kanamycin  | 173738 | (Yao <i>et al.</i> 2020) |
| <b>pJRK153</b> | <i>unc-54 3' UTR (TGC/GTA overhangs)</i> | donor plasmid     | Kanamycin  | 173740 | (Yao <i>et al.</i> 2020) |
| <b>pJRK86</b>  | <i>Prps-0::AID::GFP::unc-54 3' UTR</i>   | CeLINC assay test | Ampicillin | 173743 | This study               |
| <b>pDD375</b>  | <i>mKate2</i>                            | donor plasmid     | Kanamycin  | 91825  | Gift from Bob Goldstein  |

## Supplemental References

Schwartz M. L., and E. M. Jorgensen, 2016 SapTrap, a Toolkit for High-Throughput CRISPR/Cas9 Gene Modification in *Caenorhabditis elegans*. *Genetics* 202: 1277–1288. <https://doi.org/10.1534/genetics.115.184275>

Yao Z., F. Aboualizadeh, J. Kroll, I. Akula, J. Snider, *et al.*, 2020 Split Intein-Mediated Protein Ligation for detecting protein-protein interactions and their inhibition. *Nature Communications* 11: 2440. <https://doi.org/10.1038/s41467-020-16299-1>
