# Supplementary material
Source: publisher figshare collection journal article supplement (https://gsajournals.figshare.com/articles/dataset/_/16546098)
Supplement: Supplementary file 4 [file 3]

## Supplemental Data

### File S1. *C. elegans* strains

| Name          | Genotype                                                                                                                                                                                                                                                                                                     | Reference                            |
|---------------|--------------------------------------------------------------------------------------------------------------------------------------------------------------------------------------------------------------------------------------------------------------------------------------------------------------|--------------------------------------|
| <b>BOX249</b> | <i>let-413(mib29[let-413::mCherry-LoxP]) V; dlg-1(mib22[dlg-1::eGFP-LoxP]) X</i>                                                                                                                                                                                                                             | This study                           |
| <b>BOX451</b> | <i>let-413(mib32[let-413::AID::eGFP-LoxP]) V; dlg-1(mib23[dlg-1::mCherry-LoxP]) X</i>                                                                                                                                                                                                                        | This study                           |
| <b>BOX484</b> | <i>par-6(mib25[par-6::mCherry-LoxP]) I; pkc-3(mib78[eGFP-LoxP::AID::pkc-3]) II; mibls49[Pwrt-2::TIR-1::tagBFP2-Lox511::tbb-2-3'UTR, IV:5014740-5014802 (cxTi10816 site))] IV</i>                                                                                                                             | (Castiglioni <i>et al.</i> 2020)     |
| <b>BOX486</b> | <i>par-6(mib25[par-6::mCherry-LoxP]) I; par-3(mib68[eGFP-Lox2272::AID::par-3b+eGFP(nolntrons)-LoxP::AID::par-3g]) III; mibls49[Pwrt-2::TIR-1::tagBFP2-Lox511::tbb-2-3'UTR, IV:5014740-5014802 (cxTi10816 site))] IV</i>                                                                                      | (Castiglioni <i>et al.</i> 2020)     |
| <b>BOX493</b> | <i>pkc-3(mib78[eGFP-LoxP::AID::pkc-3]) II; mibls49[Pwrt-2::TIR-1::tagBFP2-Lox511::tbb-2-3'UTR, IV:5014740-5014802 (cxTi10816 site))] IV; dlg-1(mib23[dlg-1::mCherry-LoxP]) X</i>                                                                                                                             | (Castiglioni <i>et al.</i> 2020)     |
| <b>FT1991</b> | <i>dpy-10(cn64) pkc-3(it309[GFP::pkc-3]) II; lgl-1(xn103[lgl-1::zf1::mScarlet]) X</i>                                                                                                                                                                                                                        | (Montoyo-Rosario <i>et al.</i> 2020) |
| <b>BOX740</b> | <i>lgl-1(xn103[lgl-1::zf1::mScarlet]) X</i>                                                                                                                                                                                                                                                                  | This study                           |
| <b>BOX756</b> | <i>lgl-1(xn103[lgl-1::zf1::mScarlet]) dlg-1(mib22[dlg-1::eGFP-LoxP]) X</i>                                                                                                                                                                                                                                   | This study                           |
| <b>BOX757</b> | <i>pkc-3(it309[GFP::pkc-3]) II; lgl-1(xn103[lgl-1::zf1::mScarlet]) X</i>                                                                                                                                                                                                                                     | This study                           |
| <b>BOX758</b> | <i>let-413(mib81[GFP::LoxP::AID::let-413]) V; lgl-1(xn103[lgl-1::zf1::mScarlet]) X</i>                                                                                                                                                                                                                       | This study                           |
| <b>KK1228</b> | <i>pkc-3(it309[GFP::pkc-3]) II</i>                                                                                                                                                                                                                                                                           | CGC                                  |
| <b>BOX235</b> | <i>dlg-1(mib23[dlg-1::mCherry-LoxP]) X</i>                                                                                                                                                                                                                                                                   | This study                           |
| <b>JM125</b>  | <i>cals[Pges-1::YFP::ACT-5]</i>                                                                                                                                                                                                                                                                              | (Bossinger <i>et al.</i> 2004)       |
| <b>BOX742</b> | <i>mibEx255[Prps-0::mKate2-CRY2olig-VHH(GFP)::unc-54 3'UTR; Prps-0::CIBN-3xFLAG-MP::unc-54 3'UTR; pJRK248, <math>\lambda</math> DNA]</i>                                                                                                                                                                     | This study                           |
| <b>BOX743</b> | <i>mibEx254[Prps-0::mKate2-CRY2olig-VHH(GFP)::unc-54 3'UTR; pJRK248, <math>\lambda</math> DNA]</i>                                                                                                                                                                                                           | This study                           |
| <b>BOX759</b> | <i>par-6(mib25[par-6::mCherry-LoxP]) I; pkc-3(mib78[eGFP-LoxP::AID::pkc-3]) II; mibls49[Pwrt-2::TIR-1::tagBFP2-Lox511::tbb-2-3'UTR, IV:5014740-5014802 (cxTi10816 site))] IV; mibEx259[Pwrt-2::CRY2olig-VHH(GFP)::unc-54 3'UTR; Prps-0::CIBN-3xFLAG-MP::unc-54 3'UTR; pJRK248, <math>\lambda</math> DNA]</i> | This study                           |
| <b>BOX760</b> | <i>par-6(mib25[par-6::mCherry-LoxP]) I; pkc-3(mib78[eGFP-LoxP::AID::pkc-3]) II; mibls49[Pwrt-2::TIR-1::tagBFP2-Lox511::tbb-2-3'UTR, IV:5014740-5014802 (cxTi10816 site))] IV; mibEx260[Pelt-2::CRY2olig-VHH(GFP)::unc-54 3'UTR; Prps-0::CIBN-3xFLAG-MP::unc-54 3'UTR; pJRK248, <math>\lambda</math> DNA]</i> | This study                           |
| <b>BOX761</b> | <i>par-6(mib25[par-6::mCherry-LoxP]) I; par-3(mib68[eGFP-Lox2272::AID::par-3b+eGFP(nolntrons)-LoxP::AID::par-3g])</i>                                                                                                                                                                                        | This study                           |

|               |                                                                                                                                                                                                                                                                                              |                                                                |
|---------------|----------------------------------------------------------------------------------------------------------------------------------------------------------------------------------------------------------------------------------------------------------------------------------------------|----------------------------------------------------------------|
|               | <i>III; mibls49[Pwrt-2::TIR-1::tagBFP2-Lox511::tbb-2-3'UTR, IV:5014740-5014802 (cxTi10816 site)) IV; mibEx256[Prps-0::CRY2olig-VHH(GFP)::unc-54 3'UTR; Prps-0::CIBN-3xFLAG-MP::unc-54 3'UTR; pJRK248, λ DNA]</i>                                                                             |                                                                |
| <b>BOX762</b> | <i>let-413(mib29[let-413::mCherry-LoxP]) V; dlg-1(mib22[dlg-1::eGFP-LoxP]) X; mibEx256[Prps-0::CRY2olig-VHH(GFP)::unc-54 3'UTR; Prps-0::CIBN-3xFLAG-MP::unc-54 3'UTR; pJRK248, λ DNA]</i>                                                                                                    | This study                                                     |
| <b>BOX763</b> | <i>let-413(mib32[let-413::AID::eGFP-LoxP]) V; dlg-1(mib23[dlg-1::mCherry-LoxP]) X; mibEx256[Prps-0::CRY2olig-VHH(GFP)::unc-54 3'UTR; Prps-0::CIBN-3xFLAG-MP::unc-54 3'UTR; pJRK248, λ DNA]</i>                                                                                               | This study                                                     |
| <b>BOX764</b> | <i>pkc-3(mib78[eGFP-LoxP::AID::pkc-3]) II; mibls49[Pwrt-2::TIR-1::tagBFP2-Lox511::tbb-2-3'UTR, IV:5014740-5014802 (cxTi10816 site)) IV; dlg-1(mib23[dlg-1::mCherry-LoxP]) X; mibEx256[Prps-0::CRY2olig-VHH(GFP)::unc-54 3'UTR; Prps-0::CIBN-3xFLAG-MP::unc-54 3'UTR; pJRK248, λ DNA]</i>     | This study                                                     |
| <b>BOX765</b> | <i>par-6(mib25[par-6::mCherry-LoxP]) I; pkc-3(mib78[eGFP-LoxP::AID::pkc-3]) II; mibls49[Pwrt-2::TIR-1::tagBFP2-Lox511::tbb-2-3'UTR, IV:5014740-5014802 (cxTi10816 site)) IV; mibEx261[Phsp-16.48::CRY2olig-VHH(GFP)::unc-54 3'UTR; Prps-0::CIBN-3xFLAG-MP::unc-54 3'UTR; pJRK248, λ DNA]</i> | This study                                                     |
| <b>BOX766</b> | <i>par-6(mib25[par-6::mCherry-LoxP]) I; pkc-3(mib78[eGFP-LoxP::AID::pkc-3]) II; mibls49[Pwrt-2::TIR-1::tagBFP2-Lox511::tbb-2-3'UTR, IV:5014740-5014802 (cxTi10816 site)) IV; mibEx258[Prps-0::CRY2olig-VHH(mCherry)::unc-54 3'UTR; Prps-0::CIBN-3xFLAG-MP::unc-54 3'UTR; pJRK248, λ DNA]</i> | This study                                                     |
| <b>BOX767</b> | <i>lgl-1(xn103[lgl-1::zf1::mScarlet]) dlg-1(mib22[dlg-1::eGFP-LoxP]) X; mibEx256[Prps-0::CRY2olig-VHH(GFP)::unc-54 3'UTR; Prps-0::CIB1-3xFLAG-MP::unc-54 3'UTR; pJRK248, λ DNA]</i>                                                                                                          | This study                                                     |
| <b>BOX768</b> | <i>pkc-3(it309[GFP::pkc-3]) II; lgl-1(xn103[lgl-1::zf1::mScarlet]) X; mibEx256[Prps-0::CRY2olig-VHH(GFP)::unc-54 3'UTR; Prps-0::CIB1-3xFLAG-MP::unc-54 3'UTR; pJRK248, λ DNA]</i>                                                                                                            | This study                                                     |
| <b>BOX769</b> | <i>let-413(mib81[gfp::LoxP::AID::let-413]) V; lgl-1(xn103[lgl-1::zf1::mScarlet]) X; mibEx256[Prps-0::CRY2olig-VHH(GFP)::unc-54 3'UTR; Prps-0::CIB1-3xFLAG-MP::unc-54 3'UTR; pJRK248, λ DNA]</i>                                                                                              | This study                                                     |
| <b>BOX770</b> | <i>pkc-3(it309[GFP::pkc-3]) II; mibEx267[Prps-0::mKate2-par-6::unc-54 3'UTR; Prps-0::CRY2olig-VHH(GFP)::unc-54 3'UTR; Prps-0::CIB1-3xFLAG-MP::unc-54 3'UTR; pJRK248, λ DNA]</i>                                                                                                              | This study                                                     |
| <b>BOX771</b> | <i>pkc-3(it309[GFP::pkc-3]) II; mibEx268[Prps-0::mKate2-par-6(ΔPB1)::unc-54 3'UTR; Prps-0::CRY2olig-VHH(GFP)::unc-54 3'UTR; Prps-0::CIB1-3xFLAG-MP::unc-54 3'UTR; pJRK248, λ DNA]</i>                                                                                                        | This study                                                     |
| <b>BOX786</b> | <i>pkc-3(mib78[eGFP-LoxP::AID::pkc-3]) II; mibls49[Pwrt-2::TIR-1::tagBFP2-Lox511::tbb-2-3'UTR, IV:5014740-5014802 (cxTi10816 site)) IV; dlg-1(mib23[dlg-1::mCherry-LoxP]) X; mibEx256[Prps-0::CRY2olig-VHH(mCherry)::unc-54 3'UTR; Prps-0::CIBN-3xFLAG-MP::unc-54 3'UTR; pJRK248, λ DNA]</i> | This study                                                     |
| <b>BOX377</b> | <i>erm-1(mib40[erm-1::AID::mCherry]) I; maph-1.1(mib12[GFP::maph-1.1]) I</i>                                                                                                                                                                                                                 | (Waaaijers <i>et al.</i> 2016; Remmelzwaal <i>et al.</i> 2021) |

|               |                                                                                                                                                                                                 |                                  |
|---------------|-------------------------------------------------------------------------------------------------------------------------------------------------------------------------------------------------|----------------------------------|
| <b>BOX789</b> | <i>erm-1(mib40[erm-1::AID::mCherry]) I; maph-1.1(mib12[GFP::maph-1.1] I; mibEx256[Prps-0::CRY2olig-VHH(GFP)::unc-54 3'UTR; Prps-0::CIB1-3xFLAG-MP::unc-54 3'UTR; pJRK248, λ DNA]</i>            | This study                       |
| <b>BOX787</b> | <i>dlg-1(mib23[dlg-1::mCherry-LoxP]) X; mibEx270[Prps-0::CRY2olig-VHH(GFP)::unc-54 3'UTR; Prps-0::CIB1-3xFLAG-MP::unc-54 3'UTR; pJRK86(Prps-0::AID::GFP::unc-54 3'UTR), pJRK248, λ DNA]</i>     | This study                       |
| <b>BOX788</b> | <i>lgl-1(xn103[lgl-1::zf1::mScarlet]) X; mibEx270(Prps-0::CRY2olig-VHH(GFP)::unc-54 3'UTR; Prps-0::CIB1-3xFLAG-MP::unc-54 3'UTR; pJRK86(Prps-0::AID::GFP::unc-54 3'UTR), pJRK248, λ DNA]</i>    | This study                       |
| <b>BOX790</b> | <i>cals[Pges-1::YFP::ACT-5]; mibEx255[Prps-0::mKate2-CRY2olig-VHH(GFP)::unc-54 3'UTR; Prps-0::CIB1-3xFLAG-MP::unc-54 3'UTR; pJRK248, λ DNA]</i>                                                 | This study                       |
| <b>BOX245</b> | <i>let-413(mib29[let-413::mCherry-LoxP]) V</i>                                                                                                                                                  | (Riga <i>et al.</i> 2021)        |
| <b>BOX241</b> | <i>par-6(mib25[par-6::mCherry-LoxP]) I</i>                                                                                                                                                      | (Castiglioni <i>et al.</i> 2020) |
| <b>BOX835</b> | <i>let-413(mib29[let-413::mCherry-LoxP]) V; mibEx270[Prps-0::CRY2olig-VHH(GFP)::unc-54 3'UTR; Prps-0::CIB1-3xFLAG-MP::unc-54 3'UTR; pJRK86(Prps-0::AID::GFP::unc-54 3'UTR), pJRK248, λ DNA]</i> | This study                       |
| <b>BOX834</b> | <i>par-6(mib25[par-6::mCherry-LoxP]) I; mibEx270[Prps-0::CRY2olig-VHH(GFP)::unc-54 3'UTR; Prps-0::CIB1-3xFLAG-MP::unc-54 3'UTR; pJRK86(Prps-0::AID::GFP::unc-54 3'UTR), pJRK248, λ DNA]</i>     | This study                       |
| <b>BOX830</b> | <i>dlg-1(mib22[dlg-1::eGFP-LoxP]) X; ouls20[ajm-1::mCherry + unc-119+]</i>                                                                                                                      | This study                       |
| <b>AW1069</b> | <i>ouls20[ajm-1::mCherry + unc-119+]</i>                                                                                                                                                        | Gift from Alison Woollard        |
| <b>BOX831</b> | <i>dlg-1(mib22[dlg-1::eGFP-LoxP]) X; ouls20[ajm-1::mCherry + unc-119+]; mibEx260[Pelt-2::CRY2olig-VHH(GFP)::unc-54 3'UTR; Prps-0::CIB1-3xFLAG-MP::unc-54 3'UTR; pJRK248, λ DNA]</i>             | This study                       |
| <b>BOX836</b> | <i>ouls20[ajm-1::mCherry + unc-119+]; mibEx270[Prps-0::CRY2olig-VHH(GFP)::unc-54 3'UTR; Prps-0::CIB1-3xFLAG-MP::unc-54 3'UTR; pJRK86(Prps-0::AID::GFP::unc-54 3'UTR), pJRK248, λ DNA]</i>       | This study                       |
| <b>BOX839</b> | <i>mibEx276[Pelt2::dlg-1::GFP::unc-54 3'UTR; Pelt2::ajm-1::mCherry::unc-54 3'UTR; Prps-0::CRY2olig-VHH(GFP)::unc-54 3'UTR; Prps-0::CIB1-3xFLAG-MP::unc-54 3'UTR; pJRK248, λ DNA]</i>            | This study                       |
| <b>BOX840</b> | <i>mibEx277[Pelt2::dlg-1(ΔL27)::GFP::unc-54 3'UTR; Pelt2::ajm-1::mCherry::unc-54 3'UTR Prps-0::CRY2olig-VHH(GFP)::unc-54 3'UTR; Prps-0::CIB1-3xFLAG-MP::unc-54 3'UTR; pJRK248, λ DNA]</i>       | This study                       |

## Supplemental References

- Bossinger O., T. Fukushige, M. Claeys, G. Borgonie, and J. D. McGhee, 2004. The apical disposition of the *Caenorhabditis elegans* intestinal terminal web is maintained by LET-413. *Dev. Biol.* 268: 448–456.  
<https://doi.org/10.1016/j.ydbio.2004.01.003>
- Castiglioni V. G., H. R. Pires, R. Rosas Bertolini, A. Riga, J. Kerver, *et al.*, 2020. Epidermal PAR-6 and PKC-3 are essential for larval development of *C. elegans* and organize non-centrosomal microtubules. *eLife* 9: e62067.  
<https://doi.org/10.7554/eLife.62067>
- Montoyo-Rosario J. G., S. T. Armenti, Y. Zilberman, and J. Nance, 2020. The role of *pkc-3* and genetic suppressors in *Caenorhabditis elegans* epithelial cell junction formation. *Genetics* 214: 941–959.  
<https://doi.org/10.1534/genetics.120.303085>
- Rommelzwaal S., F. Geisler, R. Stucchi, S. van der Horst, M. Pasolli, *et al.*, 2021. BBLN-1 is essential for intermediate filament organization and apical membrane morphology. *Current Biology* 31: 2334-2346.e9.  
<https://doi.org/10.1016/j.cub.2021.03.069>
- Riga A., J. Cravo, R. Schmidt, H. R. Pires, V. G. Castiglioni, *et al.*, 2021. *Caenorhabditis elegans* LET-413 Scribble is essential in the epidermis for growth, viability, and directional outgrowth of epithelial seam cells. *bioRxiv*. doi:10.1101/2021.04.11.439327
- Waaaijers S., J. Muñoz, C. Berends, J. J. Ramalho, S. S. Goerdayal, *et al.*, 2016. A tissue-specific protein purification approach in *Caenorhabditis elegans* identifies novel interaction partners of DLG-1/Discs large. *BMC Biology* 14: 66. <https://doi.org/10.1186/s12915-016-0286-x>
